# Supplementary material
Source: publisher figshare collection journal article supplement (https://acs.figshare.com/ndownloader/files/4454713)
Supplement: Supplementary file 1 [file 4454713]

# Supporting Information

## Recovery of CdS nanocrystal defects through conjugation with proteins

Matteo Amelia<sup>1</sup>, Rebecca Flamini and Loredana Latterini\*

*Dipartimento di Chimica, Università di Perugia and Centro di Eccellenza sui Materiali Innovativi Nanostrutturati (CEMIN), Via Elce di Sotto 8, 06123 Perugia, Italy.*

|                                                                                |   |
|--------------------------------------------------------------------------------|---|
| Structure of the precursor                                                     | 2 |
| TEM Images of CdS QDs                                                          | 3 |
| 3D-AFM Images of CdS QDs                                                       | 4 |
| Absorption spectra of CdS QDs in the presence of increasing BSA concentrations | 5 |

---

<sup>1</sup> Present address: Dipartimento di Chimica "G. Ciamician", Università di Bologna, Via Selmi, 40126 Bologna, Italy

\*Corresponding author. Tel.: ++39-75-5855636; Fax: ++39-75-5855598 E-mail: [loredana@unipg.it](mailto:loredana@unipg.it) (Loredana Latterini).

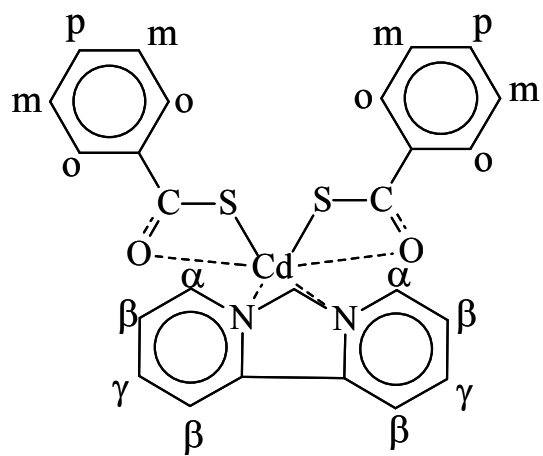

**FigureSI.** Structure of the precursor.

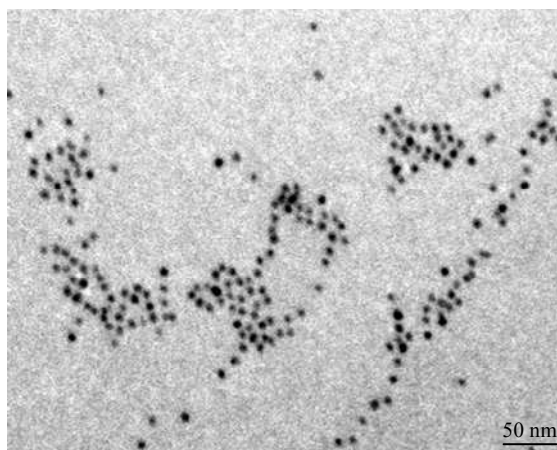

**Figure S2.** TEM Image of fraction **1**. Average size of about 2 nm.

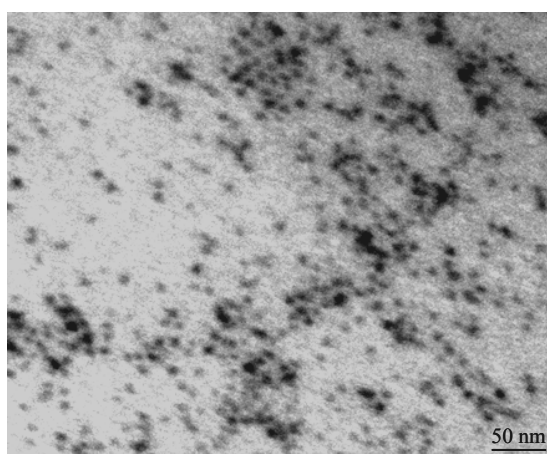

**Figure S3.** TEM Image of fraction **5**. Most present size ob about 3 nm, but some bigger and/or elongated nanocrystals are also present.

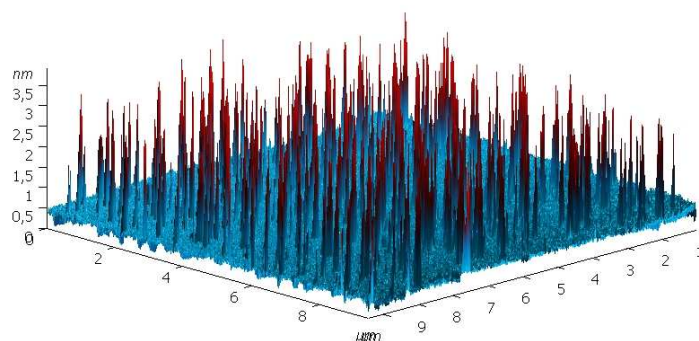

**Figure S4.** 3D-AFM Image of fraction 1.

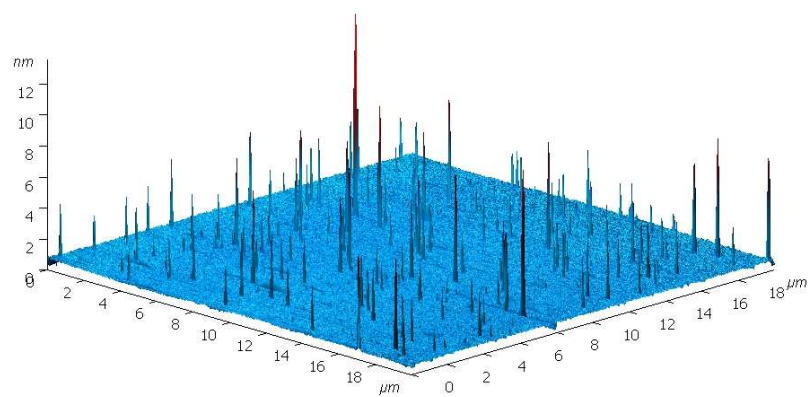

**Figure S5.** 3D-AFM Image of fraction 5.

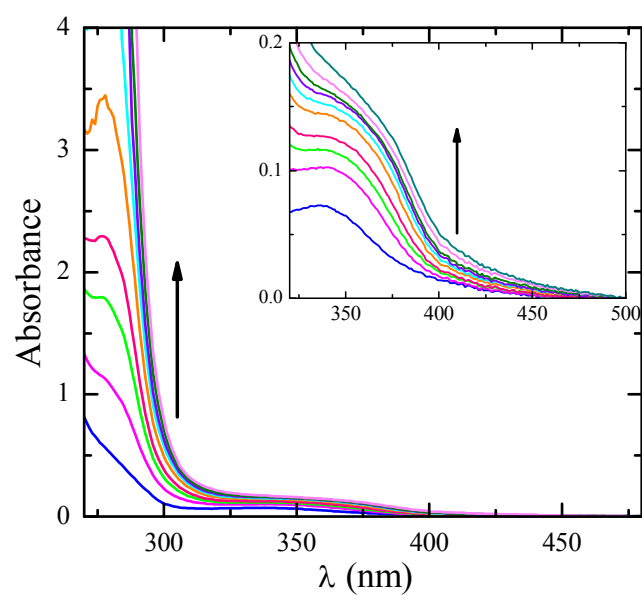

**Figure S6.** Absorption spectra of CdS nanocrystals upon addition of increasing amount of BSA (0- $2.3 \times 10^{-4}$  M).
